# Supplementary material
Source: PubMed Central journal article supplement (PMC3623071)
Supplement: MCB.01441-12_zmb999109866so1.pdf [file MCB.01441-12_zmb999109866so1.pdf]

**Table 1.** Oligonucleotide primers used in this study.

| Number/name       | Sequence (5'-3') <sup>a,b</sup>                     |
|-------------------|-----------------------------------------------------|
| 1 1085 (+)        | GTAAGCTTTTGCACCTGGAGGGCGACTG                        |
| 2 1120 (+)        | GTAAGCTTTTGAATCGCTTCTCAGCCC                         |
| 3 1146 (+)        | GTAAGCTTAGCTTGAGCCGAGAACGAGGC                       |
| 4 1162 (+)        | GTAAGCTTGAGCGGAGTGACCGGG                            |
| 5 1177 (+)        | GTAAGCTTCGTGCGCGGACACCTGCTAC                        |
| 6 1192 (+)        | GTAAGCTTGAGGAGCGGAGTAGAGAACGGC                      |
| 7 1200 (+)        | GTAAGCTTTCCCAGCCTGAGGGGCTGC                         |
| 8 1222 (+)        | GTAAGCTTGTGAAGCGAGAAGCTGCC                          |
| 9 1235 (+)        | GTAAGCTTGCGGCTCTCTCTGAGGAGG                         |
| 10 1245 (+)       | GTAAGCTTAAATCCAAGGCTATCATTGAGG                      |
| 11 1412 (-)       | TTCTCGAGCTGGCCTTCAGGTAGAAATTCC                      |
| 12 1600 (-)       | TTCTCGAGGTTGTGGTCAGACTCCTCCTC                       |
| 13 S1232A (+)     | CCTACCCCCAGTGG <b>CC</b> CCCCCTGAAGGCG              |
| 14 S1232A (-)     | CGCCTTCAGGGGG <b>GGC</b> ACTGGGGGTAGG               |
| 15 S1239A (+)     | GCTCTC <b>GCT</b> GAGGAGGAGTTAGAG                   |
| 16 S1239A (-)     | CCTCCTC <b>AGCG</b> AGAGCCGCC                       |
| 17 KK1245/6EE (+) | AG <b>GAGGAAT</b> CCAAGGCTATCATTGAGG                |
| 18 KK1245/6EE (-) | CCTTGGA <b>TTCTCCT</b> CCTCTAACTCCTCCTC             |
| 19 LL1255/7AA (+) | T <b>GCC</b> CATGCCAATGACATGAAAGAGGCAG              |
| 20 LL1255/7AA (-) | GTCATT <b>GGC</b> AT <b>GGC</b> ATATTCCTCAATGATAGCC |
| 21 L1243G (+)     | GGAGGAG <b>GG</b> AGAGAAGAAATCCAAGG                 |
| 22 L1243G (-)     | CTTCTCT <b>CCCTCCTCCT</b> CAGAGAGAGC                |

<sup>a</sup> restriction sites used for cloning are underlined

<sup>b</sup> mutated nucleotides are in bold Italic
